# Supplementary material
Source: Research Square preprint supplement (doi:10.21203/rs.3.rs-9751043/v1)
Supplement: Supplementary file 1 [file 923359bf74d200620912ac31.xlsx]

## Sheet: Coding
Article Title Name: Constructing sustainability science: a reflexive analysis of the boundary problem to define a scientific field
Authors: Julien Vanhulst & Alejandro Espinosa-Rada
Journal: Scientometrics
SetID	FullReference	Year	DOI	DataSource	UnitOfObservation	DataExtraction	QueryString_or_Seed	SubjectCategories_used	JournalList_used	TimeWindow_Start	TimeWindow_End	Corpus_Size	Inclusion_Thresholds	Sequence_Type	Boundary_Sequence	Boundary_Steps_Notes	Validation_ExpertReview	Validation_PrecisionRecall	Validation_AltBoundaryComparison	Validation_StabilityTests	Reflexivity_Level	Reflexivity_Evidence	Ontological_Stance	Main_Analytical_Techniques	Main_Outputs	Claims_About_SS_Status	Limitations_Noted	Relevance_for_Findings_4.1	Relevance_for_Findings_4.2	Relevance_for_Findings_4.3	Relevance_for_Findings_4.4
SS.1	Buter, R. K., & van Raan, A. F. J. (2013). The highly cited knowledge base of sustainability science. Sustainability Science, 8, 253–267.	2013	10.1007/s11625-012-0185-1	Web of Science Core Collection (CWTS in-house WoS derivative for indicators and normalization)	Source documents (seed set) and their cited references (used to identify a highly cited knowledge base, HCKB)	Source: WoS Core Collection (CWTS in-house derivative). Seed/boundary: TI = sustainab* (title word starting with “sustainab”) for 1999–2008 → “seed set.” Construct cited-reference universe from the seed. Define HCKB (core) by thresholds used as inclusion: local citations ≥ 6 (from the seed) AND CPP/FCSm > 1.5 (field-normalized). (De-duplication/standardization of references as needed to form the …	Title condition: publications with words in the title that start with “sustainab”* (i.e., TI = sustainab*). (Authors note they also contrasted with journals whose titles include “sustainab”, but this was not the inclusion filter.)	Yes, analytically (not as a boundary): WoS Journal Subject Categories used as proxies to compute field-normalized impact (CPP/FCSm) and to compare field occurrences across sets.	No (journals appear in descriptive comparisons; no curated list for inclusion)	1999 (seed set publication years)	2008 (seed set publication years)	Seed set: 10,594 publications (1999–2008). Distinct cited publications in the seed’s references: 66,294. Of those cited: 55,013 cited once, 11,281 cited ≥2 times, 1,379 cited ≥5 times. HCKB (after thresholds): 1,038 cited publications (≥6 local citations and CPP/FCSm > 1.5). Connectivity/structure: 29% (3,063/10,594) of seed publications share at least one HCKB reference; only 42% of the seed are…	Seed set: TI contains sustainab* (1999–2008). HCKB: local citations > 5 (i.e., ≥6 citations from the seed set) and CPP/FCSm > 1.5 (field-normalized). Document type filters for seed not further constrained in the article (HCKB not restricted by year).	Sequential	I > III > IV	TI=sustainab* seed → co-citation/impact core (local cites≥6 & CPP/FCSm>1.5) as inclusion	No (no external expert vetting of the title-based seed or HCKB composition).	No (no sampling-based PR benchmarking of retrievals).	Limited. They comment on differences with earlier mappings and mention journals with “sustainab” in the title for contrast, but do not run systematic overlap/robustness comparisons versus alternative boundaries.	Yes (network coherence and component connectivity; CPP/FCSm normalization to mitigate field citation culture differences; discussion of community structure robustness and diversity metrics).	Medium	They explicitly problematize semantic ambiguity in title-token seeding and justify moving to a high-impact co-citation core to reveal a genuine “knowledge base”. They motivate field normalization (CPP/FCSm) because SS cites across fields with heterogeneous reference lengths/citation cultures, and they discuss the limitations of JSCs as imperfect but practical proxies.	Field mapped via co-citation/keyword networks	Co-citation network on the HCKB; community detection/visualization. Descriptive contrasts of field occurrences; citation indicators (CPP/FCSm) used for profiling the HCKB (beyond the thresholding role).	An HCKB of 1,038 publications (peaking ~1994–2004) structured in co-citation clusters. Thematic presence of the three pillars (environment, economy, society), with social sciences (excl. economics) less visible. Evidence that the seed’s diversity of citations is increasing (suggesting growing heterogeneity of intellectual influences), while the diversity of venues is not necessarily following—ind…	Sustainability science exhibits a recognizable, increasingly diverse highly-cited knowledge base spanning pillars but not yet fully transdisciplinary; the intellectual foundation is consolidating while the broader discourse remains diverse.	Title-only seed (TI=sustainab*) can include heterogeneous uses and miss unlabeled relevant work. HCKB thresholds (≥6 local cites + CPP/FCSm > 1.5) are reasonable but somewhat conventional; sensitivity not explored. JSCs are imperfect proxies for fields (acknowledged). No precision/recall tests or systematic cross-boundary robustness checks.	Early exemplar of sequential boundaries where relational inclusion (III) and reputational (IV) is decisive after a I seed.	Shows how switching from content tokens (I) to relational/impact filters (III & IV) embeds stronger assumptions about coherence and significance (risk of excluding emergent/low-citation strands).	Highlights typical validation gaps for core extraction (no PR or overlap vs. alternative boundaries).	Produces a small, cohesive “core specialty” image with stable clusters—contrasting with large, heterogeneous keyword-only corpora.
SS.2	Bettencourt, L. M. A., & Kaur, J. (2011). Evolution and structure of sustainability science. Proceedings of the National Academy of Sciences, 108(49), 19540–19545.	2011	10.1073/pnas.1102712108	Web of Science Core Collection (SCI-Expanded, SSCI, A&HCI)	Publications (journal articles + conference proceedings), authors and affiliations; co-authorship relations; journals (for disciplinary attribution).	Source: WoS (SCI-Expanded, SSCI, A&HCI). Boundary: English-language records with “sustainability” in Title/Abstract/Author Keywords (no venue or citation thresholds). Window: counts to end-2009 (with tallies to June 2010). Comparison subset (for analysis only, not inclusion): “sustainable development” query (kept outside the main boundary).	WoS TS/AB/AK = “sustainability”; a comparison subset with “sustainable development” is also assembled (analytical check).	No — WoS/ISI/JCR categories are used only analytically (disciplinary profiling), not to delimit the sample.	No — no curated journal list for inclusion (journals only used descriptively/analytically).	1973 (English-language inclusion for the corpus; network series begins 1975).	2009 for the main counts (with tallies also reported to June 2010).	≈ 20,376 items (to end-2009) and 23,211 (to June 2010) from the “sustainability” query; ≈ 37,000 distinct authors; 174 countries; 2,206 cities.	English-language WoS records matching “sustainability” in TA/AB/KW; no citation or venue thresholds (articles + proceedings).	None	I	TS="sustainability" (TA/AB/KW); no venue/relational inclusion filter	No (no external vetting of the query/corpus).	No (no PR benchmarking).	Limited — comparison with “sustainable development” subset shows similar disciplinary mix (minor shifts).	Partial — strong longitudinal network stability/dynamics (densification, giant component emergence) but no sensitivity tests to boundary variants beyond SD subset.	Medium–High	Authors explicitly discuss the subjectivity of field delineation, trade-offs of database/language coverage, and the need for combined automated searches and domain expertise; they justify choices and acknowledge limitations without performing PR tests.	Field as interdisciplinary integration across pillars, mapped via co-authorship networks (cohesion inferred from the giant collaboration component forming ~2000).	Build annual co-authorship networks (1975–2010); compute densification exponent, giant-component measures. Population-dynamics modeling of author growth; geospatial mapping; disciplinary attribution via ISI/JCR (analytical).	Exponential growth (authors/papers); giant co-authorship component emergence (~2000); broad global footprint (cities/countries); substantial social-sciences share with stable disciplinary composition over time.	SS qualifies as a growing, cohesive field by virtue of network percolation and interdisciplinary composition.	English-only; database dependence; parsing/standardization challenges; commercial/aggregate nature of ISI/JCR categories; no precision/recall or broad boundary-sensitivity analyses.	Canonical I (keyword-based) in early 2010s; foundation for later hybrids.	Shows flexible but diffuse keyword boundaries and contrasts (lightly) with SD-only subsets; categories not used as proxies, avoiding category circularity for sampling.	Minimal explicit validation beyond internal checks	Portrays SS as expansive and globally cohesive via collaboration networks—contrast with small, venue/category-bounded corpora.
SS.3	Kajikawa, Y., Tacoa, F., & Yamaguchi, K. (2014). Sustainability science: the changing landscape of sustainability research. Sustainability Science, 9, 431–438.	2014	10.1007/s11625-014-0244-x	Web of Science Core Collection (SCI-Expanded, SSCI, A&HCI)	Documents and their direct-citation relations (paper-to-paper).	Source: WoS (SCI & SSCI); harvest 10-May-2013. Boundary step 1: TS = sustainab* (Title/Abstract/Keywords). Boundary step 2 (used as inclusion filter): retain only papers in the largest direct-citation component (LCC) → “mainstream SS” set.	TS=(sustainab*) → filter to maximum connected component (direct citation)	No — WoS categories are not used to delimit sampling (they rely on relational structure rather than SC filters).	No — no curated venue list for inclusion.	N/A (global retrieval up to harvest date; analysis focuses on snapshots, notably 2007 vs 2013).	2013 (database state as of May 10, 2013).	89,908 records retrieved; 51,390 retained in the LCC (57.2% of initial). The second-largest component has only 26 papers, supporting focus on the LCC.	Inclusion by topic token TS=sustainab* (TA/AB/KW). Structural filter = membership in the direct-citation LCC (no citation-count thresholds).	Sequential	I > III	TS=sustainab* retrieval → keep only direct-citation LCC (inclusion)	No external expert vetting reported.	No PR sampling/benchmarking.	Limited — comparisons are temporal (2007 vs 2013) and structural; no overlap tests versus venue lists or SC-based corpora.	Partial — argues that direct citation is preferable to co-citation/bibliographic coupling for extracting emerging research clusters; uses modularity-based clustering; coherence of focusing on LCC justified by negligible size of the second component.	Medium	They explicitly acknowledge the breadth/noise introduced by the broad token (“some papers might not be relevant”) and justify restricting to the LCC as “mainstream sustainability science,” while noting the choice excludes papers that do not inter-cite into the core. They also frame the switch to citation-only mapping (vs earlier text + citations) as a more reliable route to capture research clust…	Field as discourse/subdomains emerging from citation relations (a relational core that grows more integrated over time).	Construct direct-citation network on the retrieved set; run community detection (modularity) on the LCC; compare meso-structure 2007 vs 2013.	A mainstream LCC of ~51k papers (2013) representing the core of SS. Clear integration over time: fewer, larger clusters and hub/bridging clusters connecting previously separate areas (e.g., socio-ecological systems, transitions).	Evidence of maturation/convergence: SS shows increasing internal connectivity and emerging bridges across areas—consistent with a consolidating specialty (2007→2013).	Broad keyword introduces semantic noise; LCC filter removes niche/novel areas; no PR benchmarking or cross-boundary robustness; dependence on WoS coverage and citation availability.	Clear hybrid sequential design with III as final boundary—typical of post-2010 maturation.	Makes the connectedness ≈ relevance assumption explicit (trade-off: cohesion vs. loss of fringe novelty).	Some structural checks (tiny second component) but no PR or cross-boundary overlap tests.	Depicts SS as a cohesive core specialty rather than a diffuse discourse.
SS.4	Troullaki, K., Rozakis, S., & Kostakis, V. (2021). Bridging barriers in sustainability research: a bibliometric review. Ecological Economics, 187, 107007.	2021	10.1016/j.ecolecon.2021.107007	Web of Science Core Collection (SCI-Expanded, SSCI, A&HCI)	Documents (WoS records) within three topic-defined corpora (SS, SA, LCSA); cited references (for SA co-citation); author keywords (for keyword co-occurrence); plus a systematic review of SA case-study papers that cite key SS documents.	Source: WoS; harvest 29-Mar-2020. Three topic boundaries (allowing overlap): SS: Topic = “sustainability science” OR SO = Sustainability Science (single-venue inclusion to ensure full coverage). SA: Topic = “sustainability assessment”. LCSA: Topic = life-cycle sustainability terms (exact variants). Inclusion norms: WoS, peer-reviewed, English. SS-aware SA subset for the review = SA items that cit…	Three separate queries in WoS, one per scholarship— SS: Topic = “sustainability science” (Title/Abstract/Keywords) OR Publication name = “Sustainability Science” (to ensure full coverage of that journal). SA: Topic = “sustainability assessment”. LCSA: Topic = (“life cycle sustainability assessment” OR “life cycle sustainability analysis” OR “lifecycle sustainability analysis”). Each corpus then u…	No — WoS Subject Categories are not used to delimit sampling (categories, if discussed, are descriptive/interpretive only).	No curated multi-journal list for inclusion. (Only SO = Sustainability Science is used to augment the SS corpus—this is a single-journal coverage rule, not a curated list.)	N/A (global retrieval to the harvest date; temporal evolution is analyzed ex post)	2020-03-29 (database state on the harvest date)	SS: 1,502 records SA: 2,712 records LCSA: 181 records Authors note overlap across corpora is allowed/expected (LCSA is a near, but not exact, subset of SA).	WoS index; English; peer-reviewed publications. Inclusion by Topic field (and SO for the SS journal). No additional citation-count thresholds for sampling. (Note: Thresholds such as “min occurrences” apply only to visual mapping and are not sampling criteria.)	Union	I+II	SS: TS="sustainability science" OR SO=Sustainability Science (both inclusion); SA/LCSA: TS only	Yes (indirect) — authors combine bibliometric/SNA with qualitative reading and a systematic review of 40 SA case-study papers (those that cite key SS works), guided by explicit evaluative criteria (systemic, normative, strategic, transdisciplinary functions).	No (no PR sampling or benchmark reported)	Yes (comparative design) — three corpora (SS vs SA vs LCSA) are constructed in parallel; overlaps are analyzed explicitly (e.g., SA’s reliance on LCA literature via co-citation). Also, the SS-aware SA subset (SA items that cite seminal SS works) is interrogated separately.	Limited — robustness is addressed via triangulation of methods (keyword maps, co-citation, systematic review). Parameter sensitivity of networks (e.g., varying thresholds/algorithms) is not systematically explored (details relegated to Supplementary Material).	Moderate–High	The paper makes boundary decisions explicit (Topic/SO fields; harvest date; allowance for overlap), acknowledges database/language constraints (WoS, English), and motivates the multistep design (keyword maps → co-citation → systematic review) to mitigate single-method biases. It also theorizes what counts as “bridging” by operationalizing SS’s systemic/normative/strategic/transdisciplinary functi…	Field defined by methodological traits and practice — SS is framed as a transdisciplinary paradigm; SA/LCSA as methodological frameworks that should operationalize SS’s functions but often do not, revealing practice-level barriers.	Keyword co-occurrence maps (VOSviewer) for SS and SA (min-occ thresholds used for visualization, not sampling). Co-citation map of SA’s cited references (min local-cite threshold for visualization). Systematic content review of 40 SS-aware SA case studies using function-based criteria.	SS keyword map: three thematic clusters (e.g., socio-ecological systems; transitions/innovation; sustainability indicators/assessment). SA keyword map: emphasis on methods/instruments (e.g., LCA/MCDA) with recency overlay highlighting newer foci. SA co-citation map: five clusters; two are LCA-centric, reinforcing life-cycle dominance in SA’s intellectual base; others include MCDA, application dom…	SS articulates a transdisciplinary program, but its uptake in SA/LCSA is partial; methodological silos persist. Realizing SS’s promise requires coordination/bridging mechanisms, integration of methods, and co-production with stakeholders.	WoS/English coverage bias; topic-term dependence (sensitivity to query phrasing); overlap across corpora unavoidable; no PR benchmarking or systematic parameter sweeps; reliance on VOSviewer defaults/thresholds (reported in Supplementary Material).	Illustrates mixed boundaries within one design.	Contrasts keyword vs. venue assumptions inside the same study (flexible labels vs. institutional anchoring).	Triangulation through systematic review adds credibility, but no PR or cross-boundary overlaps quantified.	SS appears as a transdisciplinary discourse, SA/LCSA as method-centric clusters—boundary choice drives representation.
SS.5	Yarime, M., Takeda, Y., & Kajikawa, Y. (2010). Towards institutional analysis of sustainability science: a quantitative examination of the patterns of research collaboration. Sustainability Science, 5, 115–125.	2010	10.1007/s11625-009-0090-4	Web of Science Core Collection (SCI-Expanded, SSCI, A&HCI)	Documents (WoS records) and their country-level co-authorships; countries, bilateral and trilateral international collaborations; journals/subject fields used analytically to characterize topic emphases.	Source: WoS (SCI & SSCI). Boundary: TS = sustainab* (Title/Abstract/Keywords). No language, venue, or citation thresholds specified beyond WoS indexing. Time framing shown via network snapshots (1995/2000/2007), but these are analytical cuts; not separate sampling criteria.	WoS topic token sustainab* (Title/Abstract/Keywords; the asterisk is a wildcard matching “sustainability”, “sustainable”, etc.). No venue or citation thresholds for inclusion.	No — WoS Subject Categories / fields are not used to delimit sampling; they are used analytically to compute field emphases and specialization.	No curated list for inclusion (journals are described/ranked ex post; e.g., Ecological Economics, Forest Ecology and Management, Water Science and Technology, Agriculture, Ecosystems & Environment, Journal of Cleaner Production, etc.).	N/A (not explicitly constrained ex ante). Trend analyses emphasize the early 1990s onward, with network snapshots shown for 1995, 2000, and 2007.	N/A (database state up to the study’s harvest; figures/maps reported to 2007 in several analyses).	41,487 sustainability-related articles retrieved. (Journals with >100 sustainability articles are listed; e.g., Ecological Economics 809; Forest Ecology and Management 513; Water Science and Technology 511; Agriculture, Ecosystems & Environment 473; Journal of Cleaner Production 443; etc.)	WoS SCI+SSCI indexing; topic token sustainab* in TA/AB/KW; no explicit language or citation thresholds (English predominance is assumed given WoS coverage).	None	I	TS/TA/AK=sustainab*; no venue/category/relational inclusion	No (no external vetting of the query or corpus).	No (no PR sampling/benchmarking).	No (no overlap tests versus venue lists, categories, or relational cores).	Limited — internal consistency across multiple indicators (HHI, collaboration shares, intensity, specialization) and multiple time-points (1995/2000/2007), but no parameter sensitivity or alternative-boundary robustness checks.	Low–Medium	The paper acknowledges definitional debates around SS and justifies a permissive token (sustainab*) to capture the discourse/practice at scale. It notes likely English dominance and database constraints but treats these as acceptable for analyzing international collaboration patterns; it does not attempt PR validation or alternative boundary triangulation.	Coordination as mechanism shaping field composition — SS is read through international collaboration infrastructures and their evolution (who works with whom, where, and in which fields).	Co‑authorship/co‑affiliation networks; country/institution mapping; specialization indices Country-level co-authorship networks; collaboration intensity measure HHI for concentration; shares of bilateral/trilateral collaboration. Field specialization indices (analytical, using WoS categories).	Rapid growth in the number of countries publishing on sustainability since the early 1990s. A steady rise in the share of internationally co-authored publications (bilateral and trilateral). HHI declines over time: publishing activity is less concentrated in a few countries as more countries join. Geography (to 2007): the US accounts for roughly one-quarter of sustainability articles; the UK, Can…	SS is an emerging, increasingly internationalized area whose collaboration networks expand and diversify; yet regional clustering and topical specialization suggest potential barriers to the integration of diverse knowledge needed for sustainability problems.	Keyword noise from a permissive token (sustainab*). Database dependence (WoS coverage) and assumed English predominance. No PR validation or alternative boundary comparisons; Fields driven by WoS categories are used analytically and may be coarse.	Clear I (keyword-based) early design; archetypal of 2007–2013 era reliance on broad topic tokens.	Illustrates the flexible but diffuse nature of keyword boundaries; avoids category/venue circularity for sampling (categories used only analytically).	Shows absence of explicit validation (no expert/PR/robustness), typical of early delineations.	Yields a global, collaboration-centric representation (countries, networks, regional clusters, specialization), in contrast to: Keyword megacorpora emphasizing growth and heterogeneity (SS.2), Relational cores that impose cohesion (SS.3), and Venue/category corpora that are smaller/institutionalized (SS.6/SS.8).
SS.6	Pandiella-Dominique, A., Bautista-Puig, N., & De Filippo, D. (2021). Detecting trends in sustainability publications: research development and dynamics in the “Green and sustainable science and technology” category. International Journal of Innovation and Sustainable Development, 15(4), 382–???.	2021	10.1504/IJISD.2021.118375	Web of Science Core Collection (SCI-Expanded, SSCI, A&HCI) / Journal Citation Reports (for the Subject Category journal set).	WoS documents (articles & reviews) published in the journals that belong to the WoS Subject Category “Green & Sustainable Science & Technology”	Sampling frame: all articles & reviews indexed in WoS SCI/SSCI for the 36 journals listed under the JCR Subject Category “Green & Sustainable Science & Technology.” Time window: 1994–2016 (end date fixed at 2016 “to avoid problems of data outdated”). Harvest/processing: records downloaded and organized in a relational DB; no language restriction stated (WoS baseline). No keyword query (i.e., not …	Not applicable (venue/category sampling). Operational seed = JCR SC: Green & Sustainable S&T → the 36 journals in that category.	Yes — sampling (JCR/WoS Subject Category “Green & Sustainable Science & Technology”).	Yes — implicit: the 36 journals belonging to that SC (list defined by JCR at the time; names not enumerated in the PDF’s main text).	1994	2016	49,065 sustainable S&T papers (1994–2016) (articles & reviews).	Document types = articles & reviews; venue inclusion = membership in the SC’s 36 journals; no citation threshold for inclusion.	None	II	WoS/JCR SC "Green & Sustainable S&T" (journals in category; inclusion)	No (no external panel vetting of the SC proxy or of the corpus).	No (no sampling-based PR benchmarking).	No (argumentative only) — authors justify SC-based sampling and note drawbacks of journal classifications; they do not run overlap/robustness against keyword or relations corpora.	Limited — multiple analytical techniques are applied (journal coupling; co-word; correspondence analysis), but no parameter-sensitivity sweep or boundary robustness.	Moderate	They explicitly acknowledge that journal classifications are imperfect proxies of paper content and mention alternatives (keyword/co-word). They justify fixing 2016 as the endpoint to minimize database update bias, and they motivate using a coherent venue set (the SC’s journals) to study development and dynamics.	Field with identifiable ‘core’ venues and actionable framework (as institutionalized by Clarivate’s SC); internal structure then read via journal relations and subject trends.	Journal-level bibliographic coupling network (nodes = journals; edges = number of shared references) → community detection via Louvain/modularity (Gephi) → four clusters of journals. Keyword co-occurrence (co-word) mapping (VOSviewer) after semi-automatic cleansing/standardization (from 110,358 to 78,720 keywords). Correspondence analysis (keywords × years) to identify mainstream vs. emerging top…	Four journal clusters with distinct development patterns: sustainability, renewable energies, green chemistry, and green ecology. Exponential growth: two-thirds of the 49,065 papers appear after 2012; year-on-year growth positive throughout except a few dips (1995, 1997, 2000, 2004). Subject dynamics: co-word and correspondence analysis distinguish mainstream (persistent across the whole period) …	Sustainability-related research (as institutionalized under the SC) exhibits rapid, post-2012 expansion, with four venue-based sub-areas and a steady mainstream vs. emerging subject dynamic—consistent with a maturing, differentiated domain.	Category dependence (journals ≠ perfect proxies for content); Undercoverage of work outside the SC; No PR benchmarking and no cross-boundary robustness (e.g., vs TS=sustainab* or relational cores); End-date truncation (2016) may miss very recent trends.	Clear example of II via a database category (contrastable with keyword I and hybrid I→IV designs).	Illustrates assumptions/circularity of journal/category approaches: institutionalized but potentially under-inclusive; contrasts with flexible yet noisier keyword boundaries.	Shows limited validation (no expert/PR; no boundary comparisons), typical of SC-based delineations.	Produces smaller, cohesive, venue-centered representations (four clusters; sharp post-2012 growth) versus the huge/heterogeneous landscapes of keyword corpora and the core-like cohesion of relational filters.
SS.7	Blanco, J., et al. (2025). Gaps and overlaps between Sustainability Science and Environmental Humanities. Sustainability Science, 20(2), 581–596.	2025	10.1007/s11625-024-01596-1	Web of Science Core Collection (primary); Scopus used for robustness checks in SI.	WoS/Scopus documents (articles, editorial materials, reviews) for two corpora: SustSci and EnvHum.	Search date: 2 Feb 2022; window: up to and including 2021. Boundary (non-normative label match; Type I): SustSci = TS(“sustainability science*”) OR TS(“science for sustainable development”) OR SO(“sustainability science*”). EnvHum = TS(“environmental humanities”) OR TS(“ecological humanities”) OR SO(“environmental humanities” OR “ecological humanities”). Export & screening: full WoS records + cit…	Exact TS/SO strings in DataExtraction variable; Tables S1 detail all strings and counts (WoS).	No (categories not used for sampling; they work from label-matched corpora). [N/A in text—deduced from search strategy; see Methods.]	Yes (via SO filters)—journals whose source title contains “sustainability science(s)” / “environmental (or ecological) humanities” were part of the inclusion query (not a curated list).	1950 (per PY filter).	2021 (per PY filter/search date).	Pre-screening: SustSci 2,274; EnvHum 500 (WoS). Post-screening: 1,678 + 398 = 2,076.	Doc types = articles, editorials, reviews; remove missing author/year; de-duplicate by DOI/title.	Union	I+II	TS label search (SustSci/EnvHum) OR SO name pattern on venues (both inclusion)	No (no external panel vetting of strings/corpus).	No (no PR benchmarking).	No (no empirical overlap vs. category- or venue-curated boundaries).	Yes (cross-database robustness)—key analyses replicated with Scopus; SI includes a Checking for result robustness subsection.	High	Methods explicitly discuss fuzzy boundaries, risks of tautology/circular reasoning, and the ethical concern of assigning scholars to fields they do not self-identify with—motivating the non-normative (label-based) delineation. SI notes this strategy may reinforce contrasts between fields.	Field mapped via co-citation/keyword networks and treated as self-identified discourses for an agnostic comparison of SustSci vs EnvHum. (See abstract & methods framing.)	Bibliometrix workflow for social & intellectual structures (co-authorship, citation/bibliographic indicators). Keyword co-occurrence (VOSviewer) with a thesaurus for term merging/cleaning. Targeted full-text readings (128 refs; incl. most-cited in each field) to interpret overlaps/gaps.	Two label-defined corpora and comparative maps showing distinct author/journal communities and different epistemic legacies, yet shared challenges (climate change, biodiversity). SustSci tends to frame sustainability as a systemic problem integrating natural + social sciences; EnvHum emphasizes power/values via humanities + social sciences. Shared aims: bridging nature–culture, transforming socio…	SustSci shows a distinct community and systemic, solution-oriented framing (science-policy oriented), overlapping on grand challenges with EnvHum but differing in approaches and epistemic roots; there is room for cross-fertilization around shared goals.	Hybrid union (I + II) creates self-identified discourses (TS) while allowing venue-name capture (SO). Authors mitigate label-boundary effects via Scopus replication and targeted reading.	Modern hybrid design combining content and venue routes.	Surfaces the contrast between self-labeling (I) and venue anchoring (II) without relying on database categories.	Provides a strong example of stability/robustness testing (WoS ↔ Scopus), but no expert/PR/alt-boundary benchmarking—typical gaps in the genre.	Shows how label-bounded corpora yield distinct communities and conceptual emphases while revealing overlaps around shared aims; contrasts with venue-curated (Type II) or category-based (Type I via SC) corpora that institutionalize the field differently.
SS.8	Schirone, M. (2024). The formation of a field: Sustainability Science and its leading journals. Scientometrics, 129, 401–429.	2024	10.1007/s11192-023-04877-1	Clarivate Journal Citation Reports (JCR) for category and metrics; Web of Science Core Collection (WoSCC) for document metadata.	WoS documents (articles only) published in a set of 18 journals (the “leading journals” subset); journals as units for venue-level analyses.	Workflow Step 1 (pre-filter via category): Operationalize “sustainability research” using JCR Subject Category “Green & Sustainable Science & Technology” (66 journals as of March 2022). From these, identify journals with JCI > 1 (2020 JCR), ranked by JCI. This yields 18 journals (list provided in text). Workflow Step 2 (document harvesting for inclusion): Retrieve WoSCC metadata for all documents…	N/A (venue-based boundary derived from JCI > 1 within a JCR category; explicit 18-journal seed list in the paper).	Yes (for sampling) — JCR Green & Sustainable Science & Technology used as the starting category to define the candidate journal universe.	Yes — curated list of 18 journals (JCI>1 among the SC’s 66); this list constitutes the inclusion boundary for documents.	2001 (methodological choice for comparability).	2021 (WoS harvest on March 31, 2022).	71.871	Document type = article; venue = 18-journal list; no citation thresholds; reviews/editorials excluded.	Sequential	II > IV	JCR SC GSST (candidate venue set) → JCI>1 curated 18-journal list (inclusion)	No explicit expert vetting of the 18-journal list or the exclusion rules.	No (no PR benchmarking of the boundary).	No (does not empirically compare venue-based corpus against keyword or relational cores; prior studies are cited as context).	Limited — robust/standard variants are used analytically (e.g., Robust PCA), but no boundary sensitivity (e.g., alternative JCI thresholds) is reported.	Moderate–High.	The study acknowledges JIF/JCI controversies and motivates their use as proxies of symbolic capital in a Bourdieusian framework; the journal-centric view is explicit (“leading” venues as symbolic goods).	Field with identifiable ‘core’ venues and actionable framework—SS is read through venue positions and symbolic capital; journals enact strategies (systems-theory focused; generalist sustainability; discipline-anchored).	Geometric Data Analysis (GDA): Robust PCA on publication & citation data; MCA on top-50 author keywords per period (with stoplists and synonym lists). Co-citation networks (symbolic capital distribution), visualized on a sphere; Leiden for community detection. Co-authorship networks at organization and country levels; Fruchterman–Reingold layout; Leiden clustering.	Three journal strategies in shaping the field: (i) systems theory-oriented (notably Sustainability Science), (ii) generalist sustainability venues, (iii) discipline-anchored sustainability journals. Historical shift from earlier chemistry-related dominance to broader sustainability orientations. Keyword-topic MCA indicates alignment with a “weak” (broad) rather than “strong” interpretation of “su…	SS exhibits field formation dynamics across 2001–2021: venue differentiation (three strategies), a conceptual drift toward broader sustainability framings, and internationalization of contributions (notably China post-2008).	Reliance on JIF/JCI as prestige proxies (acknowledged as controversial). Boundary dependence on JCR category (Step 1) and JCI>1 threshold (Step 2). Exclusion of reviews/editorials and papers outside the 18 venues; no empirical overlap checks with keyword- or relation-defined corpora.	Exemplifies the rise of venue-based delineations (II), including two-stage venue filtering.	Clarifies institutionalization vs. analyst discretion within node-attribute boundaries (External → Analyst).	Highlights validation gaps typical of venue-based studies (no expert/PR/alt-boundary robustness), despite thoughtful theoretical reflexivity (Bourdieu, symbolic capital).	Portrays SS as a journal-centered specialty with three venue strategies; contrasts sharply with keyword I (broad/heterogeneous) and relational III (connectivity-driven) representations.
CS.9	Kajikawa, Y., Ohno, J., Takeda, Y., Matsushima, K., & Komiyama, H. (2007). Creating an academic landscape of sustainability science: an analysis of the citation network. Sustainability Science, 2, 221–231.	2007	10.1007/s11625-007-0027-8	Web of Science Core Collection (SCI-Expanded, SSCI, A&HCI)	Journal articles (nodes in a citation network) (p. 223).	Web of Science Core Collection; fields = Title/Abstract/Keywords; query = sustainab*; harvest (as reported in paper); build citation network and restrict to the Maximum/Largest Connected Component (MCC/LCC) for the analyzed corpus.	sustainab* (WoS; * is a wildcard). Field scope indicated in the paper via Fig. 1 as Title/Abstract counts for “sustainable/sustainability” (pp. 222–223). Evidence (p. 223): “We used Web of Science… and searched the papers using sustainab* as a query, where * represents a wildcard.”	No (the analysis relies on citation relations and term clustering rather than WoS/Scopus subject categories).	No (the corpus is not delimited by a preselected journal list).	N/A (no explicit start year stated in Methods).	2006	Sustainab* = 29,391 / Focus on Max. Component = 9,973 (Note: authors checked the remainder and report a second-largest component of 35 nodes; thus they focus on the MCC, p. 223).	Network inclusion: focus on the maximum connected component; second-largest component only 35 nodes (p. 223). NLP term extraction: parameters for NC-value/C-value; relevance checks against author keywords; handling of noisy terms (pp. 224–225, 228). Noise control (analytical): discussion of thresholding and noise in NLP; “a large fraction of noisy terms is recognized by NLP… we checked the releva…	Sequential	I > III	WoS TA/AB/KW sustainab* → build citation network → keep Maximum Connected Component (~9,973) (inclusion).	No	No	No	Partial / analytical checks only. Network focus justified by component structure (MCC vs. 2nd component = 35 nodes) (p. 223). NLP relevance checked against author keywords; discussion of noise and parameter choices (p. 228). (No robustness sweeps on clustering parameters reported.)	Medium	Authors explicitly caution that citation networks reflect mixed citation motivations (similar topics, unrelated but prominent papers, self-citations), hence they add NLP as a supplement (p. 228: “the citation map … must take these different motivations… into consideration. We therefore used NLP as a supplemental method…”). They inspect component structure (MCC vs. small components) and discuss no…	Treats SS as a transversal research space whose cognitive structure can be mapped via citation relations and terms in abstracts; i.e., the specialty is a networked discourse revealed by relational signals (citations) and lexical signals (NLP).	Citation-network construction, extraction of MCC, modularity-based clustering (Newman–Girvan) (pp. 223–224). Journal Weight Factor (JWF) and Country Weight Factor (CWF) to profile clusters (p. 223). NLP on abstracts: NC-value / C-value, cosine similarity, group-average clustering; dendrogram of terms; overview map (pp. 224–225, 228–229).	Identification and visualization of ≈15 major clusters (Agriculture, Fisheries, Ecological Economics, Forestry×3, Business, Tourism, Water, Urban Planning, Rural Sociology, Energy, Health, Soil, Wildlife) (pp. 225–229). An overview map (Fig. 5) showing relative positions of clusters; dendrogram of key terms (Fig. 7).	“Sustainability science is becoming a distinct scientific field” (p. 221) and can be grasped via its overall structure, current status, and future directions using citation-based mapping (pp. 221–223). Emergent multidisciplinary field with recognizable subdomains	Dependence on 'sustainab*'; sensitivity to clustering parameters; text vs citation perspectives differ. Citation behavior biases (prominence, self-citation, home-country journals) can distort maps; hence the need for NLP cross-check (p. 228). Noise in term extraction; relevance depends on parameter choices (p. 228). No explicit retrieval validation (no precision/recall; no expert query review); n…	Early, influential hybrid delineation: I (keyword) for corpus formation plus III (relations) for structure. Helps document the temporal pattern where pre-2010 studies heavily rely on sustainab* queries and begin to layer network methods.	Illustrates assumptions of keyword-based boundaries: flexible, self-designation logic (who says “sustainability” counts), with semantic noise and taxonomy-independence; contrasted with later journal/category approaches that assume institutional stabilization.	Exhibits partial validation (component check; NLP vs. author keywords) but no retrieval precision/recall and no clustering robustness—typical of the period’s validation practices.	Shows how boundary choice shapes representations: keyword+relations yields big, heterogeneous but structurally organized maps (many thousands → MCC = 9,973), accentuating domains and proximities rather than formal venues; different from journal/category cores. Core-connected representation (vs. very large keyword corpora that retain peripheries)
CS.10	Kajikawa, Y. (2008). Research core and framework of sustainability science. Sustainability Science, 3, 215–239.	2008	10.1007/s11625-008-0053-1	Analyst-selected journal set (three “core” journals defined by the authors).	Journal articles in those three venues (see inclusion notes).	Curated JournalList (Sustainability Science; PNAS; Sustainability: Science, Practice & Policy)	Scope: All items in SS, PNAS–Sustainability Science (and related PNAS papers), and SSPP, over 2003–2007. Organization for review: Authors “organized [the] papers into three categories: (1) sustainability and its definition, (2) domain-oriented research, and (3) a research framework for sustainability science.” (p. 216/217)	No (no WoS/Scopus categories for boundary).	Yes — analyst-selected list of three core journals: “we limit our analysis to publications in three selected core journals… Sustainability Science (SS), PNAS, and Sustainability: Science, Practice, & Policy (SSPP)” (p. 217).	2003 (earliest venue-specific range: PNAS SS collection 2003–2007) (p. 217).	2007 (PNAS 2003–2007; SS launched 2006; SSPP active by 2005) (p. 217).	191; Per venue (Table 1, p. 217): PNAS = 108, SSPP = 47, SS = 35; Total = 191.	Included: Research articles and (explicitly) “some editorials and commentaries” because the field was nascent and such pieces carried useful information (p. 217). Excluded: “book reviews” (p. 217). Evidence (p. 217): “we have treated these papers without distinguishing between categories, book reviews being the sole exception. Some editorials and commentaries are included…”	None	II	Inclusion by analyst-selected list of 3 journals; no relational/category inclusion filter.	No	No (no retrieval tests; no query used).	No (no comparison to alternative boundary sets).	No (no robustness sweeps; framework is conceptual/descriptive).	Medium–High	Explicitly justifies restricting to three venues and acknowledges under-coverage (p. 217). States inclusion rules (editorials/commentaries in; book reviews out) and the purpose (to structure “what SS is / aims for”) (p. 216–217). Under-coverage acknowledged (citing Clark 2007): top/selected journals may capture “no more than 5%” of important papers (p. 217). States purpose (to frame “what SS is/a…	Treats SS as an emergent field whose core can be represented by a small set of central venues, oriented to use-inspired/solution-oriented inquiry.	Structured narrative synthesis / qualitative categorization across the three venues. Framework construction: proposes indicator setting, backcasting, and problem–solution chain analysis as core components of SS (abstract & p. 216). Evidence (p. 216): “…research framework for sustainability science that includes indicator setting, backcasting, and problem–solution chain analysis.”	Descriptive mapping of the 191 items across three content categories and across domain areas (climate, biodiversity, agriculture, fishery, forestry, energy & resources, water, economic development, health, lifestyle) (p. 216/217). A normative/operational framework (indicators, backcasting, problem–solution chains) to structure SS inquiry and action.	SS is becoming a distinctive research field; a conceptual framework can already be articulated even at a “nascent stage” (p. 216/217).	Coverage: Acknowledges that focusing on top/selected journals risks large under-coverage (“no more than 5%” of important papers captured; p. 217). Selection: Analyst-chosen venues introduce curation bias (Venue-bounded, small/cohesive; potential selection bias from curated list) Time: Narrow 2003–2007 window; SS only 2006–2007 due to launch date.	Example of Type II (analyst-curated venue list) vs. external categories (JCR/SC). Captures the 2003–2007 period and shows how venue curation was used to define a core before later hybrid/citation-filtered approaches.	Venue-dependence reduces noise but risks circularity Embeds the assumption that a few central venues can represent SS’s “core”. Benefits: cohesion, conceptual clarity. Risks: circularity (the venues partly make the core) and under-coverage (authors explicitly note top venues may capture ≤5% of significant work). This differs from category-based (II) approaches because the list is not institutiona…	Validation mainly conceptual/expert-driven. No formal retrieval validation (precision/recall) and no stability tests; validation is face-validity + explicit limitation statements. Useful as an example of transparent but minimal validation typical of early SS delineations.	Cohesive 'core' portrayal vs broad keyword corpora. Produces a compact, coherent “core” (191 items) emphasizing framework & exemplars, not a broad, heterogeneous landscape. Compared with keyword-based corpora (large, diffuse) or citation/core-set methods (structural nuclei), this journal-curated lens yields high conceptual cohesion and lower breadth.
CS.11	Schoolman, E. D., Guest, J. S., Bush, K. F., & Bell, A. R. (2012). How interdisciplinary is sustainability research? Sustainability Science, 7, 67–80.	2012	10.1007/s11625-011-0139-z	Scopus	Journal articles (plus their cited references), analyzed using a three-pillar schema (economic / social / environmental)	sustainability in Title or Author Keywords (abstracts not used; excludes sustainable to avoid semantic noise); Interdisciplinarity measured via distribution of references across pillars/categories	sustainability in Title or Author Keywords (abstracts not searched); excludes sustainable to avoid semantic drift	No (not for boundary; Scopus categories are used analytically to assign pillars)	No	1996	2009	17,226 (Note: pillar-assignment subset ≈ 11,543 articles; 167,605 matched references—see Coding_Notes.)	Peer-reviewed journal items in Scopus; Title/Keyword match on “sustainability”; 1996–2009; abstracts not searched	None	I	Topic search on sustainab* (TA/AB/KW); no LCC / category / venue inclusion filter.	No (no external review of the query)	No (no retrieval precision/recall tests)	Yes — comparison against a 5% baseline sample of general articles by pillar (Jan–Mar window), total ≈ 52,376 items	No clustering robustness tests (analysis relies on entropy and stats rather than clustering)	Medium–High	Explains query design (use “sustainability”, exclude “sustainable”, omit abstracts); acknowledges Scopus coverage limits and retrieval date; reports manual QA of category/reference matching (~94% correct); reflects on cross-listed journals as drivers of interdisciplinarity signals	Treats SS as a discourse captured by self-designation (“sustainability” token) and operationalizes interdisciplinarity via a tripartite pillar model grounded in Scopus taxonomy	Shannon entropy (“bibliographical entropy”) per article using the pillar distribution of its references; Ternary plots; Kolmogorov–Smirnov tests; regressions over time; Z-scores for set comparisons	Sustainability set is more interdisciplinary than the general baseline on several contrasts; Differences across pillars (economics often showing higher median entropy); Cross-listed journals play a key role; excluding them reduces significance in most contrasts	Treats SS as a discourse captured by the keyword “sustainability”; interdisciplinarity operationalized via a tripartite pillar model (econ/social/env) based on Scopus taxonomy	Dependence on Scopus coverage and taxonomy; omission of abstracts; potential bias from cross-listing; measure captures bibliographic integration (not practice-level transdisciplinarity)	Canonical I boundary in the 1996–2009 wave: a single keyword query (“sustainability” in title/author keywords) defines inclusion; III (Relations) appears only analytically (via reference distributions across pillars). Useful exemplar of the early dominance of keyword-based delineation before later hybridizations.	Assumes that self-designation with “sustainability” validly captures the field; excludes “sustainable” to avoid semantic drift. Treats Scopus pillar categories (econ/social/environmental) as suitable proxies for interdisciplinarity, which imports taxonomy dependence and the influence of cross-listed journals—a different ontological stance than venue/category-anchored fields.	Shows partial validation (manual QA; external baseline) but no precision/recall for retrieval and no stability tests—typical validation profile of the period	Produces a large, discourse-defined corpus (~17k) and represents SS via bibliographic entropy (reference mixing across pillars), not cluster cartography. Shows SS as more interdisciplinary than a general baseline; economics often higher integration; cross-listed journals disproportionately drive effects. Likely over-represents papers that self-label with “sustainability” and under-captures substa…
CS.12	Hassan, S.-U., Haddawy, P., & Zhu, J. (2013). A bibliometric study of the world’s research activity in sustainable development and its sub-areas. Scientometrics.	2013	10.1007/s11192-013-1193-3	Scopus	Publications (articles, reviews, conference papers) at country and institution level; analyses by SD sub-areas (pp. 4–5).	(1) Select SD sub-areas by intersecting World Bank, UNDESA, OECD taxonomies (p. 4). (2) Build seed keyword sets per sub-area; retrieve Scopus records matching Title, Author Keywords, Abstracts (pp. 4–5). (3) Iteratively expand with co-occurred author keywords; domain experts vet keywords at each iteration until saturation (pp. 1, 4–5). (4) Aggregate outputs by country/institution; compute indicat…	Expert-vetted keyword queries per sub-area; matched against Title/Author Keywords/Abstracts. Example (Climate Change): “climatic changes” OR “climate warming” OR “climate change” OR “Kyoto Protocol” … (p. 4–5). Ambiguous terms are ANDed with (“sustainable” OR “sustainability”); some keywords ANDed with source titles to limit scope (p. 5).	No (not for boundary). Paper explicitly argues WoS/ASJC journal classification is not well suited to interdisciplinary SD delineation (p. 3).	No (boundary is keyword-based, not venue-based).	2000	2010	N/A (paper reports counts per sub-area/country/institution, but no single total across all SD publications is stated).	Scopus publications (articles, reviews, conference papers) in acknowledged scientific journals or conference proceedings (p. 5). Queries applied to Title/Author Keywords/Abstracts (p. 5); no citation threshold	None	I	Keyword/topic SD / sustainab* retrieval; no relational/category/venue inclusion filter.	Yes — domain experts iteratively reviewed/filtered keyword lists per sub-area (pp. 1, 4–5).	No (no formal precision/recall tests of retrieval reported).	No (multiple policy taxonomies used to choose sub-areas, but not to validate the retrieved corpus against alternative boundaries).	No (no robustness sweeps; indicators defined and applied, but no parameter-sensitivity analysis).	High	States that journal classifications (WoS/ASJC) are ill-suited for interdisciplinary SD (p. 3). Explains iterative keyword building with expert vetting and controls for ambiguity (AND with “sustainable/sustainability”; source-title scoping) (pp. 4–5). Notes Scopus affiliation ID consolidation for institutions to avoid miscounts (p. 5).	Treats SD as a problem-oriented, cross-cutting discourse best captured through expert-curated keyword regimes (rather than venues/categories), yielding topic-specific portraits at country/institution level.	Publication counts, citation counts, CPP (citations per paper), sliding time windows based on median citation half-life to smooth trends (p. 6).	Top countries and institutions by sub-area (e.g., Climate Change, Renewable Energy, Water, Biodiversity, etc.), with publication, citation, CPP contrasts (pp. 6–10+). Shows different national/institutional focus profiles across sub-areas; e.g., strong U.S./U.K. presence in Climate Change; U.S./China convergence in Renewable Energy (p. 6).	Positions SD scholarship as interdisciplinary and expanding, and argues that keyword collection is a flexible and useful approach for interdisciplinary bibliometrics (p. 1).	Dependence on Scopus coverage/indexing; Keyword ambiguity mitigated but not eliminated (ANDing with “sustainable/sustainability”; source-title filters) (p. 5); No precision/recall or robustness testing of retrieval.	Exemplar of I (keyword-based boundary) in 2000–2010, with expert vetting and iterative expansion; no hybrid category/relational delimiters.	Shows assumptions behind keyword approaches: flexible yet taxonomy-independent, but reliant on self-designation and expert heuristics; explicitly rejects category-based delineation for SD (p. 3).	Strong expert review of queries but no precision/recall; no stability tests—illustrative of partial validation practices that improve construct validity without retrieval benchmarking.	Produces broad, pillar-like snapshots (by sub-area, country, institution), emphasizing volume/impact trends rather than network structure; different representation than journal-core or citation-core maps.
CS.13	Zhu, J., & Hua, W. (2016). Visualizing the knowledge domain of sustainable development (1987–2015): a bibliometric analysis. Scientometrics.	2016	10.1007/s11192-016-2187-8	Web of Science Core Collection (SCI-Expanded, SSCI, A&HCI)	WoS publications/records (articles/reviews/proceedings; the paper treats WoS “records” as units) plus an ESI Top Papers subset used for highlighting.	Built a topic dataset in WoS; used CiteSpace to generate co-citation networks (cited references & cited journals) and keyword co-occurrence networks. Time slicing: 1987–2015, 2-year slices; pruning = Minimum Spanning Tree; selection = g-index (k=7) for each slice (CiteSpace defaults). Constructed a complementary ESI Top Papers subset to surface influential items.	TS=(sustainab*)	No (not for boundary). WoS subjects/disciplines are used analytically (e.g., lists of high-BC subjects and high-CB disciplines), not to delimit inclusion.	No (no venue list used for boundary).	1987	2015	59,926 WoS records in the main dataset (ALL). A separate ESI subset contains 626 top papers. (Results/Methods)	WoS topic retrieval on Title/Abstract/Author Keywords for SD terms; language/country unrestricted (the paper notes 32 languages, 49 countries in the set). No explicit document-type filter is reported → N/A for stricter type constraints.	None	I	SD token-based retrieval; networks only for analysis (not inclusion)	No (no external expert vetting of the query or of retrieved sets is reported).	No (no retrieval precision/recall tests).	No (no alternative boundary set is contrasted against the WoS topic query).	Partial/None — parameters are stated (time slicing; k=7; MST pruning), but no robustness sweeps or sensitivity analyses are reported.	Medium	Authors contrast two retrieval approaches (broad sustainab* token vs curated keyword lists) and justify choosing the former for a macroscopic map. They prefer SD over “sustainability science,” acknowledging conceptual discrepancies. They note limitations of citation counts and potential subjective bias, presenting their “new approach” as a contribution despite unexpected results.	Treats SD as a macro knowledge domain best visualized through bibliometric relations (co-citation & keyword co-occurrence) and frontier detection (CB/BC) rather than through institutionally fixed venues/categories.	CiteSpace: cited-reference and cited-journal co-citation networks; keyword co-occurrence network. Betweenness Centrality (BC) and Citation Bursts (CB) to identify turning points, frontiers, and hotspots. Cluster labeling with TF-IDF; reporting of cluster sizes, silhouette, timeline visualizations.	A clustered co-citation map (1987–2015) with 17 clusters (five largest summarized), including areas like industrial ecology, climate change, ecological economics, etc. Top cited journals by BC/frequency (e.g., Science, Nature, Ecological Economics). Country patterns (US, UK, China, etc.), and subject/discipline rankings (high-BC subjects; high-CB disciplines). Keyword hotspots/heatmaps highlighti…	SD research exhibits rapid growth, shifting fronts, and broad interdisciplinarity; certain disciplines (e.g., materials, operations research) show strong recent bursts, signaling emerging frontiers.	Citation-count shortcomings and potential subjective biases acknowledged; No retrieval benchmarking (precision/recall), no alternative boundaries; Dependent on WoS coverage/indexing and CiteSpace parameter choices (not stress-tested).	Clear instance of I (keyword-based) delineation at scale (1987–2015) with III relational mapping—fits the historical pattern of query-driven corpus building in the mid-2000s–2010s.	Highlights assumptions of keyword/topic approaches: flexible and taxonomy-independent, but self-designation dependent; contrasts with journal/category boundaries (institutional proxies) the study explicitly avoids for delimitation.	Demonstrates partial/implicit validation (method parameter transparency; ESI subset for salience) but lacks query precision/recall and robustness checks—typical of many large-scale keyword-based maps.	Produces big, temporally sliced relational maps (co-citation/keywords) that foreground frontiers and hotspots; representations differ markedly from journal-core (small/cohesive) or category-based (institutional) corpora.
CS.14	Salas-Zapata, W. A., Ríos-Osorio, L. A., & Cardona-Arias, J. A. (2016). Methodological characteristics of sustainability science: a systematic review. Environment, Development and Sustainability.	2016	10.1007/s10668-016-9801-z	ScienceDirect and EBSCO (multiple EBSCO databases listed; search executed May 25, 2014). Evidence: “searched in ScienceDirect and EBSCO databases on May 25, 2014… in ScienceDirect, the option ‘ALL’ from advanced search was employed…” (Methods, p. 3).	Journal articles.	Database queries (ScienceDirect/EBSCO) → de-duplication → title/abstract screening → full-text screening using inclusion/exclusion rules; dual screening with disagreements resolved by consensus/third-party verification (p. 4). Articles then coded for journal type, geography, concept use, and methodological design.	Keyword logic aimed at “sustainability” + method terms. Reported examples include “TI=sustainability AND TX=methods OR methodology)”; ScienceDirect “ALL” field used (p. 3). (Exact full strings not printed in one line; authors provide fielded fragments as above.)	No (WoS/Scopus categories not used for boundary).	No (no pre-set journal list for boundary; journals later classified by aims & scope only for analysis).	2013 (single-year observation window).	2013. Evidence: window “restricted to such time period since, according to Scopus, 2013 had the highest number of articles (2,929) including ‘sustainability’ in the title” (p. 4); also noted Scopus still reported 2013 as peak on May 5, 2015 (p. 4).	253 included research articles. Evidence: “After applying search protocol … 253 research articles …” (Results, p. 6).	Document type: “Journal Articles” (ScienceDirect) / “Academic journal articles” (EBSCO) (p. 4). Language: English (p. 4). Year: 2013 (p. 4). Topical token: “sustainability” in the title (p. 3–4). Methods section present (excludes papers without a methods section) and excludes papers that only state assumptions about ‘sustainability’ (pp. 4–5).	None	I	PRISMA-style keyword retrieval; inclusion not by SC/venue/relations	No (no external expert vetting of queries reported).	No (no retrieval precision/recall tests).	No (no comparison to category lists or alternative boundaries).	No (no robustness/sensitivity analyses; process QA only—dual screening with consensus/third reviewer, p. 4).	Medium–High.	Justifies the single-year window (2013) using Scopus trend evidence (peak volume; p. 4). Discloses database differences and fielded search choices (ScienceDirect “ALL”; EBSCO TI/TX field fragments; p. 3). Details screening workflow and conflict resolution (consensus/third-party; p. 4). Acknowledges that query choices may miss/over-include items (implicit in exclusion rules for “no methods section…	Treats SS as a methodologically specifiable research program; operational focus is on whether SS actually implements the methodological traits often ascribed to it (systems approach, transdisciplinarity, participation, problem-solving).	Systematic review with structured coding and descriptive statistics (percentages, distributions across journal types, geographies, design categories). (No network or cluster analysis.)	Journal types of publication (environmental sciences/studies vs. other areas). Geographic distribution (e.g., Europe 37.5% (n=95); Americas 21.7% (n=55); Asia 20.9% (n=53); Oceania 4.3% (n=11); Africa 5.5% (n=14); multi-country 5.9% (n=15); p. 7–8). Concept use: many papers do not define “sustainability”; among those that do, no shared assumptions (p. 9–10). Methodological designs: relatively low…	Finds limited maturity: few shared theoretical assumptions, weak implementation of touted SS methodological traits, and no coherent method typologies—hindering consolidation of SS as a mature field (Abstract & Discussion).	Database dependence (ScienceDirect/EBSCO coverage; field operators); Single-year window (2013) limits generalization; Keyword/title token (“sustainability”) risks semantic noise and misses unlabeled but relevant work; No retrieval benchmarking (precision/recall) or alternative boundary checks.	Canonical I case: cross-database keyword boundary with field constraints (TI “sustainability”, method terms), single year (2013), and process QA—illustrating the dominance of keyword strategies and the rise of cross-database searches.	Shows the assumptions behind title/keyword approaches: self-designation dependence (TI = “sustainability”), flexible but no institutional proxy, hence noise and coverage trade-offs; journal “aims & scope” used analytically rather than as boundary (contrasts with journal/category strategies).	Good example of process-oriented validation (dual screening; consensus/third reviewer) yet no query precision/recall and no alternative boundary—typical partial validation profile for reviews built on general-database queries.	Boundary yields a small, cohesive, methods-focused corpus (n=253) and a representation centered on methodological practice (design types, concept use, venues, geography)—very different from journal-core mini-corpora or co-citation structural maps.
CS.15	Fang, X., Zhou, B., Tu, X., Ma, Q., & Wu, J. (2018). “What Kind of a Science is Sustainability Science?” An Evidence-Based Reexamination. Sustainability, 10(5), 1478.	2018	10.3390/su10051478	Primary retrieval: Web of Science Core Collection (search conducted January 10, 2018). Supplementary/contextual: OPAC (journal titles containing “sustainability”) + addition of PNAS Sustainability Science and Nature Sustainability (not in OPAC). Citation provenance (peripheral): Google Scholar (GS) and WoS labels when listing most-cited items in the definitional set.	(1) WoS publications matching SS title/abstract/keywords (1st database). (2) Documents that explicitly define/characterize SS (2nd database). (3) Proposed research questions of SS (3rd database).	Stage 1 (WoS Core Collection, 10 Jan 2018): Search titles, abstracts, and author keywords for “sustainability science”, “science of sustainability”, “science for sustainability.” Result: 832 items (composed of 16 “science for sustainability,” 43 “science of sustainability,” 789 “sustainability science,” with 16 duplicates resolved). Additionally, via OPAC they identified 27 journals with “sustain…	WoS Core Collection topic search on Title/Abstract/Keywords for: “sustainability science” OR “science of sustainability” OR “science for sustainability”.	No (WoS categories not used for boundary).	No (the OPAC list + 2 added venues are used analytically to track journal proliferation, not to delimit the corpus).	N/A (no explicit year filter applied in retrieval).	N/A (retrieval performed on Jan 10, 2018 without an end-year limit).	First database (WoS search): 832 items. Second database (definitions/characterizations): 43 items (37 from WoS + 6 grey). Third database (SS questions): 70 questions (five sources).	Stage 1: WoS records with the three SS tokens in title/abstract/keywords; duplicates removed. Stage 2: Full-text must explicitly define/describe SS; include grey literature cited by core SS sources; exclude redundant question set (Swart et al.). Stage 3: Include SS research questions from the specified five sources.	None	I	“sustainability science / science of/for sustainability”; no LCC/SC/venue inclusion.	No (no external panel vetting of queries; PRISMA is procedural rather than expert validation).	No (no retrieval precision/recall tests reported).	No (OPAC/venue tally is context, not an alternative boundary evaluation).	No (robustness of retrieval not tested; Mann–Kendall and Pettitt assess temporal trends, not boundary stability).	Medium–High.	PRISMA approach with staged screening and explicit rationale for three SS tokens. Transparent additions of grey literature and manual venue additions (PNAS SS, Nature Sustainability) for journal proliferation context. Explicit reporting of database choice, search date, duplicates, and downstream counts (832 → 37 → 43; 70 questions).	Treats SS as a self-identified scholarly discourse whose identity can be reconstructed from definitions/characterizations and core research questions; growth assessed via label-bounded outputs and journal proliferation.	PRISMA-style literature screening; content synthesis of definitions and questions. Descriptive bibliometrics (counts, sources, citations) and trend/change-point tests (Mann–Kendall, Pettitt). Contextual use of GS/WoS citation tallies for definitional items.	S-shaped growth. A consolidated set of 43 SS definitions/characterizations and 70 SS research questions (five sources). Temporal growth of SS-labeled publications and accumulation of SS-titled journals. Identification of turning points in SS development via trend/change-point tests.	SS exhibits growth (publications, journals), identifiable change points, and a coalescing definitional/question space, while still reflecting ongoing scope debates.	Label dependence (may miss unlabeled but relevant work). No precision/recall or alternative boundary checks. OPAC-based journal count + manual additions are indicative, not exhaustive. Inclusion of grey literature improves coverage but complicates standardization.	Textbook I: WoS T/A/K search for three SS labels, plus staged screening—illustrates keyword/label dominance with PRISMA rigor.	Shows assumptions of label/title strategies: flexible and concept-focused yet narrow/under-covering; avoids category/venue circularity but relies on self-designation and journal-title heuristics for context.	Demonstrates procedural validation (PRISMA staging, explicit counts) but no retrieval benchmarking (precision/recall) and no boundary robustness; trend tests validate temporal patterns, not corpus construction.	Produces a small, cohesive conceptual representation (43 defs; 70 questions) and journal-proliferation context—distinct from large, heterogeneous keyword corpora or citation-network cartographies.
CS.16	van der Hel, S. (2019). Research programmes in global change and sustainability research: what does coordination achieve? Current Opinion in Environmental Sustainability, 39, 135–146. + Supplementary Material.	2019	10.1016/j.cosust.2019.07.006	Programme-based lists of “core publications” taken from the annual reports of IGBP and IHDP; metadata (authors, addresses, journal, references, abstracts) manually retrieved from Web of Science (Thomson Reuters WoS) using SAINT (Rathenau Institute).	Core publications of the target programmes (by time slice); their references; author-country affiliations; abstracts (for co-word); plus a journal-based control set (three most common journals per programme & period).	Time slices: four two-year windows spaced five years apart: 1997/98, 2002/03, 2007/08, 2012/13 (IHDP not analyzed for 1997/98 because launch in 1996 + ramp-up). Core publications: taken from IGBP & IHDP annual reports; for IHDP 2002/03, also include publications listed in Core Project reports (annual reports listed too few). Special issues: to avoid topic bias, only the first article of each spec…	N/A (no keyword query; organisational/programme membership defines inclusion).	No — JCR/WoS subject structure for overlay maps & Rao–Stirling diversity; not used to delimit the corpus.	Yes (analytical only) — top-3 journals per programme & period for the control set; not used to delimit inclusion.	1997	2013	398 core publications in total (per Appendix A: Tables A.1–A.2). (Breakdown reported across series; previously noted sums of 308 and 90 correspond to sub-sets and together equal 398.)	Programme core-publication lists (annual reports; IHDP Core Project reports for 2002/03); first article only from any special issue; WoS records with complete metadata/abstracts; control = first three issues per selected journal & year; Science/Nature/PNAS excluded from control-journal pool.	None	V	Programme membership (annual-report “core publications”) defines inclusion; no relational filter.	No formal external expert vetting of the corpus (programme reports taken as authoritative).	No (no retrieval tests; manual WoS look-up for identified items).	Yes (analytical comparator) — journal-based control sets benchmark indicators; note this is not an alternative boundary for inclusion.	No formal robustness sweeps; Appendix notes interpretive caveats (e.g., network density is size-dependent; use comparatively).	Medium–High.	Explicit sampling choices to mitigate bias (special-issue rule; IHDP Core Project supplementation); exclusion of ultra-multidisciplinary journals from control sets; transparent time-slice design and indicator definitions; acknowledgment of comparative (not absolute) interpretation of density/overlays.	Frames sustainability/global-change research as coordinated programme arenas; evaluates how coordination shapes disciplinary breadth, geographical reach, and conceptual integration within programme-bounded outputs.	Rao–Stirling diversity on references + overlay maps on the WoS basemap; author-country distributions (incl. OECD vs non-OECD); co-word networks from abstracts with network density as a summary; comparisons against journal-based control sets.	Time-slice indicator panels per programme series showing trajectories in disciplinary diversity, geographical diversity, and conceptual integration, contextualized by control sets.	Coordination via large programmes can modulate disciplinary and geographical diversity and influence conceptual integration, though effects are uneven and governance-dependent.	Dependence on programme reporting for core lists; reliance on WoS/JCR for disciplinary lens; density is scale-dependent; no robustness sweeps; control sets benchmark but do not validate inclusion.	Showcases a V delineation (Programme report–based core publication lists)	Clarifies assumptions of programme-membership boundaries: reduced semantic noise vs keyword queries, but introduces agenda/reporting biases; ontologically distinct from institutional category proxies and analyst-selected journal lists.	Illustrates analytical benchmarking (control sets) and reflexive caveats; still no precision/recall or stability testing—typical for curated organizational corpora.	Produces compact, comparable indicator panels (discipline, geography, concept integration), unlike large, heterogeneous keyword corpora or venue-core representations—highlighting coordination effects rather than mapping the whole field.
CS.17	Horcea-Milcu, A.-I., Martín-López, B., Lam, D. P. M., & Lang, D. J. (2020). Research pathways to foster transformation: linking sustainability science and social-ecological systems research. Ecology and Society, 25(1), 13.	2020	10.5751/ES-11332-250113	Web of Science Core Collection (SCI-Expanded, SSCI, A&HCI)	Web of Science (WoS) Core Collection records retrieved 20 June 2016.	Search date: 20-Jun-2016. Fields: Title, Abstract, Author Keywords. Language: English. Query blocks (as provided in the paper’s Table 2): • SS: “sustainability science”. • SES: “social-ecological system*” OR “human-environment* system*” OR “human-nature system*” OR “human and natural system*” OR “human-natural system*”. • TD (used in intersections): “transdisciplinar*” OR “co-design*” OR “codesig…	Explicit strings above (Table-style in article); applied to WoS Title/Abstract/Keywords.	No (not for boundary).	No	N/A (no explicit lower bound; includes earliest records returned by WoS up to the search date).	June 2016 (search date; “published until June 2016”).	Block totals (as reported): SS = 586; SES = 2,532; SS AND TD = 105; SES AND TD = 117; SS AND SES = 3,118; (SS AND SES) AND TD = 222. Core set = 51 (after removing 9 overlaps). Citing-articles set = 13,755.	WoS records in English matching block queries; top-15 most-cited per year (per block) for the core 51; deduplication across blocks; citing-articles set = all WoS items that cite the core papers.	Sequential	I > IV	WoS block queries (SS/SES/TD intersections) → top-15 most-cited per year per block → dedupe to core-51 (inclusion for “core” analyses).	No (no expert panel vetting of queries/selection).	No	No	No (no robustness sweeps of retrieval/selection parameters).	High	States WoS-only and English-only; acknowledges imbalance (single SS term vs multiple SES terms); explains software-driven choice (not using Scopus); notes that the core may skew conceptual; cautions that metrics can reflect terminology rather than practice.	Treats SS and SES as discursive formations; the “field” is reconstructed via textual labels and their intersections (nominalist, discourse-centric).	(Post-collection) VOSviewer term co-occurrence maps (titles/keywords/abstracts), modularity clustering, graph density, centralities (weighted degree, betweenness, eigenvector); multiple networks (per block, intersections, core, citing-articles).	Four recurring archetypes (environmental change & ecosystem services; resilience & vulnerability; knowledge production; governance); identification of bridging concepts; demonstration that SS ∧ SES is cohesive, while adding TD increases heterogeneity.	SS and SES are intertwined discourses; transdisciplinarity acts as a bridge yet increases semantic diversity; transformation pathways concentrate around place-based, participatory, policy-linked work.	WoS-only; English-only; query imbalance (SS vs SES); top-cited selection may bias toward conceptual pieces; no precision/recall or robustness tests.	Example of Sequential I (Lexical) -> IV (Reputacional) in the 2010s (WoS topic queries + top-cited selection), complementing earlier query-based delineations.	Makes visible the assumptions/trade-offs of keyword boundaries: flexibility and taxonomy independence vs semantic noise/coverage bias; avoids category/venue circularity.	Transparent selection logic but no retrieval benchmarking or stability testing—typical partial validation in semantic-mapping studies.	Boundary choice produces conceptual archetypes/bridges rather than journal cores or citation-core specialties; the representation emphasizes semantic structure and transformational themes.
CS.18	Clark, W. C., & Harley, A. G. (2020). Sustainability Science: Toward a Synthesis. Annual Review of Environment and Resources, 45, 331–386.	2020	10.1146/annurev-environ-012420-043621	Web of Science Core Collection (SCI-Expanded, SSCI, A&HCI)	WoS records (“qualified works”) associated with specific research programs relevant to sustainability science (program-level corpora), as well as the review’s narrative synthesis (no single unified field corpus).	Scope design: start from a candidate list of research programs (via colleagues, prior surveys, exploratory searches). Program-tailored WoS queries: iteratively tuned per program to identify “qualified works” (Pasteur’s Quadrant focus). Screening rule: for each query configuration, manual reading (title/abstract/body snippets) of the most recent 100 items to judge qualification; adjust strings to …	Program-specific Boolean strings (one per research program) tuned to capture Pasteur’s-Quadrant scholarship (i.e., not simply “sustainab*”); authors stress that “sustainability” token-only searches both over- and under-include relevant work.	No (not for boundary). Program delineations are query-based, not built from Clarivate categories.	No (lists of “top journals” are descriptive outputs, not inclusion rules).	2000 (primary counting window for program outputs).	2019 (primary counting window; some trend panels extend to 1980 for historical context).	Aggregate across programs: 20,813 qualified works (2000–2019) (some works returned by multiple queries).	English; documents = articles/books/book chapters; program-tailored queries; manual adjudication of the latest 100 hits per query to ensure Type-1 <10%; iterative broadening to reduce Type-2 under the same cap; inclusion limited to Pasteur’s Quadrant (problem-oriented, generalizable insights).	None	I	Program-tailored topic queries with manual tuning (Type-1 <10%); doc type/language = Inclusion_Thresholds, not a distinct boundary.	Yes (internal) — authors manually screened the most recent 100 results for each query to adjudicate “qualification” and tune strings. (No external panel.)	Partial/Informal — explicit Type-1 (<10%) target with iterative adjustments to reduce Type-2; not a full formal PR evaluation over the entire corpus.	Yes (discussion-level) — authors show that searches requiring “sustainable”* alone would miss ~one-third of “qualified works,” arguing for program-tailored strategies.	No — no formal sensitivity/stability sweeps of query parameters reported.	High	Justifies program-tailored (vs. sustainability-token) searches; Discloses WoS-only, English-only, document-type limits; Admits subjectivity in “qualification” judgments; Notes the field’s fragmentation and the rapid growth that challenges any single mapping.	Frames sustainability science as an applied, Pasteur’s-Quadrant field; seeks generalizable guidance via an integrative framework synthesizing multiple research programs rather than a single corpus-delimited “field.”	Narrative synthesis building an Integrative Framework + six capacities; Program-level bibliometrics in the SI: WoS counts (2000–2019), extended trends (to 1980), top journals/organizations; query tuning with manual adjudication.	Framework for Research in Sustainability Science (elements/relationships of the Anthropocene as a complex adaptive system); Six capacities (measure, equity, adapt, transform, link knowledge–action, governance); List of influential research programs + program-specific search strategies and bibliometric summaries.	Field is rapidly expanding (doubling every 3–4 years), fragmented but converging; sustainability science should proceed via iterative, problem-driven work supported by the six capacities.	WoS-only, English-only, doc-type limits; subjective qualification; no “short list” of journals/organizations covers the field; counts are indicative, not definitive.	Clear case of I with advanced, program-tailored queries; demonstrates the shift from early “sustainab*” heuristics to richer query strategies.	Unpacks assumptions of keyword approaches: flexible and less circular than category/journal proxies but judgment-dependent; shows sustainability-token searches miss ~1/3 of relevant works.	Rare example with explicit Type-1/Type-2 tuning (quasi precision/recall), yet no external expert vetting or robustness sweeps—informative but not a full validation protocol.	Produces a meta-representation (program landscape + integrative framework) rather than a single corpus map; contrasts with journal/category or citation-core delineations in how it portrays the “field.”
CS.19	Herberg, J., Schmitz, S., Stasiak, D., & Schmieg, G. (2021). Boundary speak in sustainability studies: Computational reading of a transversal field. Science and Public Policy, 48(3), 398–411.	2021	10.1093/scipol/scab006	A journal-based corpus of ~29,992 articles (1968–mid-2018) drawn from ten selected sustainability/transdisciplinarity journals; texts were made machine-readable and (for all but three smaller journal components) downloaded via Elsevier APIs/Scopus servers; selection of journals was informed by expert consultation (IASS/Leuphana) and processed using the Laubichler Lab infrastructure at ASU.	Individual articles published in the ten selected journals (corpus-level).	Boundary construction by choosing ten journals to represent transdisciplinary sustainability studies (with expert input): "Sustainability: Science practive and policy", "Sustainability: Accounting, Management and Policy", "Sustainability Science", "Sustainability", "Minerva", "Journal of Cleaner Production", "Global Environmental Change", "Futures", "Ecosystem Services", "Ecological Economics" Bu…	N/A (no keyword search used for inclusion; corpus is journal-list–based).	No (Clarivate/Scopus categories not used to delimit inclusion).	Yes — ten analyst-selected journals ("Sustainability: Science practive and policy", "Sustainability: Accounting, Management and Policy", "Sustainability Science", "Sustainability", "Minerva", "Journal of Cleaner Production", "Global Environmental Change", "Futures", "Ecosystem Services", "Ecological Economics") intended to capture the transdisciplinary sustainability discourse (names not enumerat…	1968	2018	29,992 articles	Belonging to one of the ten selected journals. Within the 1968–2018H1 window. Machine-readable full text successfully acquired/cleaned. No explicit language filter stated.	None	II	Analyst-selected list of 10 journals; no LCC/category inclusion filter.	Yes (selection) — experienced researchers at IASS/Leuphana were consulted to ensure the journals appropriately reflect the field. (No external panel formalization.)	No (no retrieval PR tests—boundary isn’t query-based).	No (the paper motivates journal-list vs search-string approaches but does not run a systematic alternative-boundary comparison).	No (no sensitivity/robustness sweeps on the inclusion boundary).	High	Authors explicitly frame the study as exploratory/generative, cautioning against “homogenizing” representations; they discuss selection bias, the “methodological uncanny” of computational tools, and emphasize that results do not claim representativeness but serve to theorize a transversal field.	Treats transdisciplinary sustainability studies as a transversal field with coexisting technocratic & deliberative vocabularies, resisting closure into a single “common language.”	(Post-collection) Computational corpus linguistics: a 24-term vocabulary (12 “technocratic”, 12 “deliberative”) defines two semantic vectors; manifold learning (Isomap) embeds all articles in a low-dimensional space; analyses include term frequency contrasts, top-100 technocratic vs top-100 deliberative poles, and a “middle 100” near the median to examine the in-between zone.	Identification of distinct vocabularies and two poles (technocratic vs deliberative) with a densely populated middle → evidence of semantic pluralism / transversal structure. Conceptualization of “boundary speak” with four pathways: homogenization, translation, pidgin, creole (trade-offs for policy/practice).	Transdisciplinary sustainability studies constitutes a transversal field that oscillates between deliberative and technocratic vocabularies; attempts to enforce a common language risk trading clarity for collaborative appeal and semantic elasticity.	Bias from analyst-selected journals; Data pipeline (Elsevier/Scopus APIs, text cleaning) shapes corpus; Predetermined 24-term vocabularies can steer findings; Results are exploratory, not representative; no robustness or alternative-boundary checks.	Demonstrates journal-list delineation (Type II), complementing the prevalence of keyword strategies; shows how venue choice alone can define the field’s boundary.	Highlights the assumptions of journal-list approaches: institutionalized but curated delimitation (less semantic noise than keywords; no reliance on Clarivate categories), yet selection bias and publisher/venue dependence; contrasts with category proxies (Type II) and token searches (Type I).	Validation is selection-expertise (consultation) rather than precision/recall; no alternative boundary benchmark or stability tests—illustrative of limited validation practices in venue-bounded designs.	Produces a large, venue-bounded semantic map with two poles + populated middle; different from keyword-based (often huge/heterogeneous) or citation-core representations; underscores how boundary choice (journals) shapes the visible language politics of the field.
CS.20	Bautista-Puig, N., Mauleón, E., & Sanz-Casado, E. (2021). Analysis of social, environmental and economic sustainability core: a bibliometric overview. International Journal of Innovation and Sustainable Development, 15(4), 356–381.	2021	10.1504/IJISD.2021.118374	Web of Science Core Collection (SCI-Expanded, SSCI, A&HCI)	WoS-indexed publications matching the three pillar queries (environmental, economic, social).	Database: WoS Core Collection. Search fields: Topic (Title/Abstract/Author Keywords; WoS standard). Search strings (pillar tokens): • “environmental sustainab*” • “economic sustainab*” • “social sustainab*” Time window for retrieval: 1993–2017 (start year chosen because each pillar has ≥3 docs by 1993). Scope: no restriction by document type; all countries included. Records were exported and stor…	“environmental sustainab*” OR “economic sustainab*” OR “social sustainab*” (executed separately by pillar in WoS Topic fields).	No (SC used only for specialization analysis)	No (no pre-set venue list for inclusion).	1993	2017	Total unique across the three pillars: 8,765 documents (1993–2017). Per pillar: Environmental = 6,107; Economic = 1,683; Social = 1,302.	WoS Topic hits matching each pillar string; no document-type filter; global coverage; 1993–2017.	None	I	Union of pillar tokens in WoS Topic: “environmental sustainab*” OR “economic sustainab*” OR “social sustainab*”.	No (no external expert vetting of queries).	No (no PR benchmarking of retrieval).	No (does not compare against category- or journal-based boundaries).	No (does not compare against category- or journal-based boundaries).	Medium	Notes bias/limitations of WoS as a source. Justifies start year (1993) by minimal presence across pillars. Acknowledges that results depend on token choice and database coverage; suggests some items could have been missed.	Treats “sustainability” as a three-pillar discourse (environmental/economic/social) that can be operationalized via text tokens; the “core” is captured by sustainab* occurrences paired with each pillar.	Descriptive bibliometrics: annual output, CAGR, country/institution production, collaboration type (national/international/none). Specialization by WoS category using f-measure (Rousseau). Keyword co-occurrence maps with VOSviewer (Author & Plus Keywords). Acknowledgements analysis (output/visibility comparisons; IRaMuTeQ similarity analysis).	Environmental pillar dominates output (≈70%); economic and social are smaller. Country/institution rankings and collaboration patterns by pillar. Top WoS categories specialized for each pillar (via f-measure). Thematic maps (co-occurrence networks) per pillar; acknowledgement patterns contrasted.	Shows that “sustainability” research (by pillar tokens) is growing rapidly, is uneven across pillars (environmental most developed), and exhibits distinct disciplinary specializations and collaboration patterns.	Database dependence (WoS) and its coverage biases. Token dependence (use of “sustainab*” with pillar labels can over/under-include). No retrieval validation; no alternative boundary checks; potential misses acknowledged.	Database dependence (WoS) and its coverage biases. Token dependence (use of “sustainab*” with pillar labels can over/under-include). No retrieval validation; no alternative boundary checks; potential misses acknowledged.	Exposes assumptions of keyword approaches: flexible but label-dependent and diffuse, with semantic noise (broad “sustainab*”) and pillar bias; categories/journals are used analytically rather than as proxies (contrast with Type II or analyst-selected lists).	No explicit validation beyond transparent reporting of strings and windows; absence of precision/recall, expert vetting, or robustness illustrates common validation gaps.	Produces large, heterogeneous corpora with strong growth and broad thematic dispersion (via co-occurrence), and disciplinary specialization via WoS categories—contrasting with journal-bounded or core-set/citation representations.
CS.21	Asatani, K., Takeda, H., Yamano, H., & Sakata, I. (2020). Scientific Attention to Sustainability and SDGs: Meta-Analysis of Academic Papers. Energies, 13(4), 975.	2020	10.3390/en13040975	Scopus (chosen to include conference proceedings as well as journal articles).	Individual Scopus-indexed publications retrieved via a sustainability token query (journal + conference literature).	Database: Scopus. Query: TITLE-ABS-KEY(sustainab*) (the “sustainab*” token, following Kajikawa’s precedent). Cut-off date: items published prior to 2 January 2019. Connectivity filter: restrict to items in the largest connected components of the citation network (to discard unrelated/isolated records). Resulting dataset size: 312,584 sustainability-related publications.	TITLE-ABS-KEY(sustainab*) in Scopus (token intended to capture records explicitly marked “sustainable/sustainability” by authors).	No (not for boundary construction).	No	N/A (not explicitly bounded ex ante; figure shows publication counts from 1970 onward).	2019-01-02 (retrieval cut-off; note authors comment that 2019 coverage in Scopus is incomplete).	514,480 publications retreived (after connectivity filter; “largest connected components”: 312,584 articles)	Scopus TITLE-ABS-KEY(sustainab*); published before 2 Jan 2019; member of the largest connected components in the citation network. (No stated language or document-type exclusions; conference proceedings included.)	Sequential	I > III	Scopus TITLE-ABS-KEY(sustainab*) → keep Largest Connected Components of citation network (inclusion).	No (no expert vetting of the query/boundary reported).	No (no precision/recall benchmarking of retrieval).	No (no category-proxy or journal-list comparison).	No (no sensitivity/robustness sweeps of query or LCC choice).	Medium–High.	Motivates Scopus (to capture conference literature); acknowledges token dependence (undercoverage of unlabeled relevant work) and 2019 incompleteness; explains the LCC step and its rationale.	Treats “sustainability” as a labelled discourse retrievable via text tokens, then examines its structure and SDG proximity through citation relations and text similarity.	Citation-network clustering (modularity/community-detection; recursive subclustering for large clusters). Text processing (lemmatization; term filtering) and TF–IDF on titles+abstracts. SDG correspondence via cosine similarity between cluster TF–IDF vectors and UN SDG descriptions. “Convergently Discussed Degree (CDD)” to highlight terms discussed convergently across the network for each SDG.	Large-scale cluster landscape of sustainability-related research; examples of clusters aligned with or weakly linked to specific SDGs. Identification of emergent subfields (e.g., in energy/materials) within the sustainability-labelled corpus. SDG attention profiles and convergent subtopics (via CDD).	Sustainability research is diverse, rapidly expanding, and unevenly aligned with SDGs; some goals attract strong attention, others appear primarily as convergent cross-cutting themes.	Token dependence (“sustainab*” misses unlabeled but relevant work). Database dependence (Scopus coverage; 2019 incomplete). Relations boundary bias: LCC removes isolates/periphery, potentially under-representing niche areas. No precision/recall, alternative-boundary comparison, or stability checks.	Strong example of I at very large scale, with an added III (Relations) secondary boundary—illustrates contemporary, hybrid delineations.	Shows assumptions/trade-offs of keyword approaches (flexible, scalable, policy-alignable via SDG text) and how a relations filter further shapes the corpus (dropping isolates), contrasting with category- or journal-based delineations.	Transparent pipeline for clustering/SDG matching, but no retrieval validation (no PR; no expert vetting) and no robustness checks on the LCC choice—typical validation gaps in large token+network studies.	Produces heterogeneous cluster maps tied to SDG narratives; the LCC step yields a representation biased toward the connected core, unlike journal-bounded corpora or citation-core–only studies; highlights how boundary choices reframe the field.
CS.22	Quental, N., & Lourenço, J. M. (2011). References, authors, journals and scientific disciplines underlying the sustainable development literature: a citation analysis. Scientometrics, 90, 361–381.	2011	10.1007/s11192-011-0533-4	Web of Science Core Collection (SCI-Expanded, SSCI, A&HCI)	Source literature: WoS records that match the query (papers explicitly on SD/SS). Cited references within the source literature (used to identify influential works/authors/journals). WoS subject categories used analytically to profile disciplinary composition of the source set.	Query fields: Title, Abstract, Author Keywords. Query strings: exact phrases “sustainable development” OR “sustainability science”. Initial retrieval: 7,800 records (first record 1981). Inclusion threshold: restrict to items with ≥ 2 citations → 3,334 papers retained (the “source literature”). Build a references database from the 3,334 papers; deduplicate/standardize references (merge book editio…	TS = “sustainable development” OR “sustainability science” (Title/Abstract/Keywords in WoS).	Yes (analytical only) — WoS categories for disciplinary profiling; later collapsed to broader groups (per authors’ simplification).	No (journals are ranked as outputs, not used to delimit inclusion).	1981 (year of the earliest retrieved record).	2008 (search run Oct 2008; no later records included).	Initial retrieval: 7,800. After ≥2-citations filter (source literature): 3,334 papers. References (descriptive): 126,958 citations to 97,618 unique references; 84,666 (87%) cited once, 12,569 (13%) cited 2–9 times, 380 (0.4%) cited ≥10 times. Average references per source paper: 38. Reference date range: 1556–2008.	Exact-phrase match in Title/Abstract/Keywords for SD or SS; ≥ 2 citations (to increase “scientific relevance”).	Sequential	I > IV	WoS exact phrases (“sustainable development” OR “sustainability science”) → ≥2 citations (inclusion).	No (no external panel vetting of strings or thresholds).	No (no PR benchmarking of the retrieval).	Discussion-level only — authors argue against sustainab*-type queries (e.g., Kajikawa et al. 2007) as too inclusive, but do not run an empirical overlap/robustness comparison.	No (no sensitivity tests for the ≥2-citations rule or for query variants).	Medium–High.	Justifies using exact phrases to avoid semantic noise from *“sustainab / sustainability”**. Explains the ≥2 citations rule to avoid mixing fields with different citation cultures. Normalizes reference impact by dividing citations by the number of source-set papers published after the reference (age adjustment), and discusses caveats (recent works).	Treats sustainable development/sustainability science as a self-identified discourse best captured by explicit labeling (exact phrases); then reveals the field’s intellectual base via cited references and disciplinary attributions.	Descriptive growth of source literature (per year). Disciplinary composition via WoS categories (collapsed to broader groups). Citation analysis of references: standardization, counts, and age-adjusted influence (citations divided by eligible citing papers after the reference). Rankings: influential references, authors, and journals.	Growth curve (1981–2008) for SD/SS-labeled papers. Disciplinary breakdown of the source literature. Lists of most influential references (books/policy documents prominent: e.g., WCED 1987, Wackernagel & Rees 1996, Ostrom 1990, etc.), authors, and journals shaping the SD discourse.	The SD literature shows sustained growth and a canon of influential works that frame subsequent research; the intellectual base spans policy reports and foundational books alongside journal articles.	Database dependence (WoS coverage). Undercoverage from exact-phrase strategy (misses relevant unlabeled work). Threshold bias (excludes all 1-citation papers). Age-adjustment helps but can penalize recent references. No PR validation or alternative-boundary robustness checks.	Clear instance of I but stricter (exact phrases) and with an inclusion threshold (Type IV) —useful to contrast with broader sustainab* queries and with later hybrid designs.	Highlights assumptions of exact-phrase boundaries: low semantic noise and high face validity, yet under-inclusive; categories are used analytically (not as proxies), avoiding category circularity.	Demonstrates partial reflexivity (age-adjustment, rationale for ≥2 citations) but no expert/PR/stability validation—typical limitations in early 2010s delineations.	Produces a coherent, canon-centric representation (3.3k items; heavy book/policy influence) rather than the very large, heterogeneous landscapes seen with sustainab* token corpora or journal/category boundaries.

## Sheet: Codebook
Field	Description_ES
SetID	Unique study identifier used in the matrix (e.g., SS.3, CS.17). SS= Seed Set | CS = Citations Set
FullReference	Full bibliographic reference of the study (authors, year, title, journal, volume/pages).
Year	Publication year of the study (use online-first year if explicitly stated; otherwise print year).
DOI_or_URL	DOI string
DataSource	Databases or sources actually used to retrieve records (e.g., WoS Core Collection, Scopus, JCR, in-house CWTS).
UnitOfObservation	Empirical entities observed for sampling/measurement (e.g., publications, journals/venues, authors/affiliations, programs/centers).
DataExtraction	Boundary & sampling only. Exact strategy to construct the corpus: database, fields/queries, inclusion/exclusion rules (doc type, language), time window, harvest date, category filters used for inclusion, and relational/metric filters used as inclusion (e.g., “keep LCC”). Do not list post-corpus analytics here.
QueryString_or_Seed	Verbatim query strings or seed lists used to trigger retrieval (e.g., TS = sustainab*; SO = Sustainability Science; list of 18 journals).
SubjectCategories_used	Yes if WoS/Scopus/JCR categories are used to delimit inclusion; No if categories are used only analytically (discipline profiling).
JournalList_used	Yes if inclusion is defined by a venue list (curated by analyst or derived from an external taxonomy/rule); No otherwise.
TimeWindow_Start	First publication year included by design (not the first observed if the window is open-ended). Use “N/A” if not set ex ante.
TimeWindow_End	Last publication year included by design or by harvest date. Use “N/A” if not set ex ante.
Corpus_Size	Size of the included corpus (post-filter). If multiple sets (e.g., SS/SA/LCSA), report each.
Inclusion_Thresholds	Any thresholds that filter inclusion beyond query fields (e.g., doc types; ≥2 citations; LCC-only; JCI>1; presence in SC).
Sequence_Type	One of: Sequential (A→B filters), Union (A OR B), None (single criterion).
Boundary_Sequence	Compact path using inductive operational typology proposed: I Lexical (query-based), II Venue/Category (source-based), III Relational (network-based), IV Reputational thresholds (impact-based), V Programme report–based core publication lists.
Boundary_Steps_Notes	Notes explaining the steps and whether they filter inclusion (e.g., TS=sustainab* seed → keep LCC (inclusion)).
Validation_ExpertReview	Did the study use expert vetting of strings/corpus? Values: Yes/No/Partial (+ brief note in Reflexivity_Evidence or Coding_Notes if needed).
Validation_PrecisionRecall	Any precision/recall benchmarking of retrieval/sampling? Values: Yes/No/Partial (describe design in Coding_Notes if applicable).
Validation_AltBoundaryComparison	Empirical overlap/robustness vs. alternative boundaries (keywords vs. venues vs. categories vs. relations)? Values: Yes/No/Partial.
Validation_StabilityTests	Stability/robustness checks (algorithm/parameter sensitivity; temporal robustness; cross-database replication). Values: Yes/No/Partial.
Reflexivity_Level	Coder judgment of boundary reflexivity: None / Low / Moderate / High (apply consistently).
Reflexivity_Evidence	Brief verbatim/summary cues justifying the reflexivity level (e.g., explicit discussion of boundary arbitrariness/circularity; mitigation steps).
Ontological_Stance	How the study conceptualizes the field. Use controlled labels (pick one dominant): Field as discourse/subdomains emerging from citation relations; Field with identifiable ‘core’ venues and actionable framework; Field as interdisciplinary integration across pillars; Field as multiple thematic sub-areas; Field mapped via co-citation/keyword networks; Field defined by methodological traits and pract…
Main_Analytical_Techniques	Post-corpus techniques only (e.g., co-citation, direct-citation network, bibliographic coupling, keyword co-occurrence, topic modeling/NLP, PCA/MCA/GDA, overlays, systematic review).
Main_Outputs	Headline results (e.g., number/nature of clusters; emergence of a giant component; venue strategies; mainstream vs. emerging topics).
Representation_Notes	How the boundary shapes the image of the field (e.g., “large, heterogeneous discourse” under I; “small, cohesive, status-weighted” under II; “mainstream core” under I+IV).
Claims_About_SS_Status	The study’s explicit claims about SS (e.g., consolidating specialty; fragmented discourse; differentiated venue system; internationalization).
Limitations_Noted	Limitations acknowledged by the authors (database bias, language coverage, circularity of categories, lack of PR, threshold sensitivity, etc.).
Relevance_for_Findings_4.1	How the study informs prevalence/evolution of strategies based on operational typology.
Relevance_for_Findings_4.2	How it exemplifies assumptions embedded in keyword vs. journal/category approaches (flexibility vs. circularity; discourse vs. institutionalization).
Relevance_for_Findings_4.3	What it shows about validation practices (presence/absence; types used; robustness).
Relevance_for_Findings_4.4	What representations it produces (size, cohesion, disciplinary centrality, geography) compared with other boundary types.
