# Supplementary material
Source: Research Square preprint supplement (doi:10.21203/rs.3.rs-9751043/v1)
Supplement: Supplementary file 2 [file bfb2295dc601624aa41b72a8.docx]

**Appendix A. OpenAlex supplementary search: methodology and results**

This appendix documents the broader search conducted in OpenAlex to quantify the recall gap of the primary WoS title-restricted query. The search was implemented in R using the openalexR package and the OpenAlex REST API (polite-pool mailto: anespinosa@uc.cl). The R script (search_openalex.R) is available as supplementary material.

**Lens A (title-restricted).** OpenAlex filter: title.search:"sustainability science" AND abstract.search:"bibliometric|scientometric|field delineation|field mapping". Replicates the logic of the WoS title-restricted query. Records returned: 26.

**Lens B (abstract-level).** Two sub-queries combined and deduplicated. B1: abstract.search:"sustainability science" AND abstract.search:"bibliometric|scientometric|scientometrics". B2: abstract.search:"sustainability science" AND abstract.search:"field delineation|boundary specification|corpus construction|field mapping". Records returned: 137 (after deduplication across B1 and B2).

**Combined result (A ∪ B).** Union of Lens A and Lens B, deduplicated by OpenAlex work ID: 139 records. Full eligibility screening of this set against the PRISMA criteria used for the primary corpus (§3.1) was outside the scope of this validation exercise. The combined deduplicated dataset is available in the supplementary data file.

**Note on Lens C.** A third lens (Lens C) targeting core scientometrics and sustainability journals by venue name was tested (Scientometrics, Journal of Informetrics, Research Policy, Sustainability Science, Ecological Economics), with an abstract-level filter for sustainability-related content. The venue display-name filter returned no records via the OpenAlex API at the time of retrieval; Lens C results are therefore excluded from the combined count.
